# Supplementary material for: MNX1 Promotes Malignant Progression of Cervical Cancer via Repressing the Transcription of p21cip1
Source: Front Oncol. 2020 Aug 11;10:1307. doi: 10.3389/fonc.2020.01307 (PMC7431913; doi:10.3389/fonc.2020.01307)
Supplement: Supplementary file 5 [file Table_5.xlsx]

## Sheet: Sheet1
Table S5: Sequences of shRNAs
name	sense	anti-sense
sh-NC	UUCUCCGAACGUGUCACGUTT	ACGUGACACGUUCGGAGAATT
sh-MNX1	CGAGACCCAGGUGAAGAUUTT	AAUCUUCACCUGGGUCUCGTT
